# Supplementary material
Source: PubMed Central journal article supplement (PMC6329978)
Supplement: pnas.1814027116.sapp.pdf [file pnas.1814027116.sapp.pdf]

## Supplementary Information for

Mutational landscape of primary, metastatic and recurrent ovarian cancer reveals c-MYC gains as potential target for BET inhibitors

Charles Li<sup>a,1</sup>, Elena Bonazzoli<sup>b,1</sup>, Stefania Bellone<sup>b</sup>, Jungmin Choi<sup>a</sup>, Weilai Dong<sup>a</sup>, Gulden Menderes<sup>b</sup>, Gary Altwenger<sup>b</sup>, Chanhee Han<sup>b</sup>, Aranzazu Manzano<sup>b</sup>, Anna Bianchi<sup>b</sup>, Francesca Pettinella<sup>b</sup>, Paola Manara<sup>b</sup>, Salvatore Lopez<sup>b</sup>, Ghanshyam Yadav<sup>b</sup>, Francesco Riccio<sup>b</sup>, Luca Zammataro<sup>b</sup>, Burak Zeybek<sup>b</sup>, Yang Yang-Hartwich<sup>b</sup>, Natalia Buza<sup>c</sup>, Pei Hui<sup>c</sup>, Serena Wong<sup>c</sup>, Antonella Ravaggi<sup>d</sup>, Eliana Bignotti<sup>d</sup>, Chiara Romani<sup>d</sup>, Paola Todeschini<sup>d</sup>, Laura Zanotti<sup>d</sup>, Valentina Zizioli<sup>d</sup>, Franco Odicino<sup>d</sup>, Sergio Pecorelli<sup>d</sup>, Laura Ardighieri<sup>e</sup>, Dan-Arin Silasi<sup>b</sup>, Babak Litkouhi<sup>b</sup>, Elena Ratner<sup>b</sup>, Masoud Azodi<sup>b</sup>, Gloria S. Huang<sup>b</sup>, Peter E. Schwartz<sup>b</sup>, Richard P. Lifton<sup>f</sup>, Joseph Schlessinger<sup>g,2</sup>, and Alessandro D. Santin<sup>b</sup>

Joseph Schlessinger

Email: [joseph.schlessinger@yale.edu](mailto:joseph.schlessinger@yale.edu)

### **This PDF file includes:**

Supplementary text

Figs. S1 to S7

Tables S1 to S10

References for SI reference citations

## Supplementary Information Text

### Materials and Methods

**Patients and specimens.** The study protocol was approved by the Yale Human Investigation Committee. Prior to surgical staging, patients were consented for tumor banking in accordance with the Declaration of Helsinki. DNA was extracted from 90 primary tumors, including 13 matched pairs from patients with bilateral ovarian tumors, metastatic tumors (n=41), and recurrent tumors (n=17) who underwent surgical staging for the treatment for their disease at Yale University, New Haven, CT or the University of Brescia School of Medicine, Brescia, Italy. The majority of the tumors had high grade serous ovarian cancer (HG-SOC) histology (Table S1). The 1988 FIGO staging system was used and histology was further evaluated by board-certified pathologists to confirm that the frozen section was histologically consistent with an ovarian carcinoma. Main criteria for selection were: 1) the diagnosis of ovarian cancer confirmed by the review of a minimum of 2 Board certified surgical pathologists with specific expertise in Gynecologic oncology, 2) the availability for light microscopic evaluation of a hematoxylin and eosin stained section of each frozen tumor specimen submitted to sequencing for assessment of percent tumor nuclei and percent necrosis in addition to other pathology annotations and 3) the availability of sufficient fresh frozen tumor tissue for DNA extraction for NGS. Genomic DNA was prepared from venous blood, primary fibroblast cultures or frozen myometrium by standard procedures. We confirmed that each section contains a high purity of tumor (>40%) and minimal necrosis and used those sections for DNA extraction. Primary ovarian cancer cell lines with tumor purity above 90% and less than 3 weeks of culture in vitro were used for sequencing. We also performed whole-exome sequencing on DNA extracted from 13 matched ovarian cancer pairs (ie, right and left ovarian cancers) from patients with bilateral tumors.

**Whole exome sequencing.** For fresh frozen and cell line samples, genomic DNA was isolated by Allprep DNA kit (Qiagen # 80204). For FFPE samples, DNA was extracted by BiOstic® FFPE Tissue DNA Isolation Kit (MO BIO Laboratories #12250-50) with a modified protocol.

Genomic DNA was captured on the NimbleGen 2.1M human exome array and subjected to 74 base paired-end reads on the Illumina HiSeq 2000 instrument as described (1). Sequence reads were mapped to the reference genome (hg19) using the ELAND program. Reads outside the targeted sequences were discarded and statistics on coverage were collected from the remaining reads using in-house Perl scripts.

**Somatic point mutation and indel calling.** For matched normal-tumor pairs, somatic point mutations were called by MuTect2. The output was further filtered to remove false positives caused by low base/read quality or mismapping. We also required a minimum number of reads with non-reference alleles based on total coverage of the position and sequencing error of the platform. Somatic indels were called by an in-house pipeline detecting regions with multiple nearby loci showing differences of reference and non-reference reads coverage between tumor and normal samples. All indels have been manually curated. For unmatched tumors, SAMtools was used to call variant bases appended with quality scores. Among these, variants with frequency more than  $2 \times 10^{-5}$  in

ExAC (Exome Aggregation Consortium (ExAC), Cambridge, MA (URL: <http://exac.broadinstitute.org>) were excluded and the rest were considered as potential somatic variants. Identified variants were annotated based on novelty, impact on the encoded protein, conservation, and expression using an automated pipeline.

**Somatic copy number mutation calling.** Copy number variants were identified by comparing coverage depth of individual capture intervals (0.5Mb bins) from primary, metastatic and recurrent tumor and normal samples after normalization for mean coverage depth of each exome. A permutation-based strategy was used to assess the significance of recurrent CNVs with a false discovery rate cutoff of 0.25 after Benjamini Hochberg correction previously detailed in (2). LOH calling and purity estimation were performed as previously described (2). Independent significant CNV peaks were called based on a GISTIC-like peel algorithm (3).

**Evaluation of subclonality in SBOC samples.** Variant allele fraction of somatic mutations called by MuTect2 and allele-specific copy number variations called by Sequenza (4) were provided to PyClone (5) to cluster cancer cell fractions using a hierarchical Bayesian clustering model. Clusters containing at least two mutations were used to infer a consensus clonal evolution model for bilateral ovarian tumors using ClonEvol (6).

**Real-time reverse transcription-PCR (qRT-PCR).** RNA isolation from carcinoma cell lines and fresh frozen tissues was performed using AllPrep DNA/RNA/Protein Mini Kit (Qiagen, Valencia, CA, USA), according to the manufacturer's instructions. Quantitative PCR was carried out with a 7500 RealTime PCR System using the manufacturer's recommended protocol (Applied Biosystems, Foster City, CA, USA) to evaluate the expression of PIK3CA, TP53, and MYC. The primers and probes were obtained from Applied Biosystems (i.e., PIK3CA, Assay ID: Hs00180679\_m1; TP53, Assay ID: Hs01034249\_m1; MYC, Assay ID: Hs00153408\_m1). The comparative threshold cycle method was used to determine gene expression in each sample, relative to the value observed in non-malignant endometrial epithelial cell samples collected from similar age women, using glyceraldehyde-3-phosphate dehydrogenase (Assay ID Hs99999905\_m1) RNA as an internal control.

**Cell lines.** Primary ovarian carcinoma cell line establishment was performed as described previously from our group for uterine serous carcinomas (2). Source-patient characteristics from which sequenced tumor cell lines were established are described in Table S1.

**Drug.** GS-626510 and JQ1 (GS-589903) were obtained from Gilead Science. They were dissolved in DMSO (Sigma-Aldrich, St. Louis, MO) to create a 10 mM stock solution for the *in vitro* and *in vivo* studies as described below.

**Cell viability assay.** To determine dose-response, cells were treated with scalar amounts of each drug ranging from 0.001  $\mu$ M to 5  $\mu$ M and counted by flow cytometry as previously described (7).

**Xenograft implantation and in vivo drug study.** Specimen collection and all animal experiments were approved by the institutional ethical committee (HIC) and Institutional Animal Care and Use Committee (IACUC) of Yale University. Briefly, four to six week old CB-17/SCID mice were given a single subcutaneous injection of  $7 \times 10^6$  KRCH31 cells in approximately 300  $\mu$ L of a 1:1 solution of sterile PBS containing cells and Matrigel (BD Biosciences) while for the PDX experiments, OMM78 was obtained from a surgical specimen at the time of a staging procedure of a high-grade serous carcinoma patient (stage IVA) and placed into a sterile Petri dish containing phosphate-buffered saline (PBS), then sliced into  $5 \times 5 \times 2$  mm fragments. Typically, one fragment was implanted into a subcutaneous area in the right or left flanks in combination with Matrigel. The size of the implanted tumor was checked 1-3 times per week using Vernier calipers when the implanted tissue was palpable, and the volume was calculated as  $(\text{length} \times \text{width}^2)/2$ . Once the tumor volume was approximately 0.2  $\text{cm}^3$  for the xenografted cell lines and about 0.4  $\text{cm}^3$  for the PDX, the mice were randomized into treatment groups (n=5-10) and drugs delivered orally and BID for GS-626510 and IP Q-day for JQ1 (GS-589903) for a total of 21 days. On day 21, after last dose administration animals were either euthanized or follow up for overall survival as the primary outcome measure. Tumor measurements were recorded twice weekly. Mice were sacrificed if found in poor health conditions or when the tumor volume exceeded the maximum value established by the IACUC. Animal care and euthanasia were carried out according to the rules and regulations as set forth by the Institutional Animal Care and Use Committee (IACUC).

**Pharmacodynamic studies in mice.** Female CB17/lcrHsd-Prkd/scid mice (15-19 g) bearing KRCH31 tumors were treated orally and BID for GS-626510 and IP Q-day for JQ1 (GS-589903) and vehicle for oral gavage studies for a total of 21 days. One, 6 and 12 hours post treatment three/four animals per time point were euthanized and tumors excised and halved for analysis. One half was flash frozen and stored at  $-80^\circ\text{C}$  for pharmacodynamics studies. The second half was fixed in formalin for 24 hours and then transferred in Ethanol 70% for biomarker and histopathological evaluation. Immunostaining results from tumor tissues excised from KRCH31 xenografted animals were interpreted using an automated computational image analysis system (Definiens Tissue Studio software, Munich, Germany). For each stain, we used the Tissue Studio software to define an intensity and size threshold for nucleus identification and to define an intensity threshold for nuclear stain positivity essentially as previously described (8). The automated analysis software was trained for scoring only the appropriate epithelial regions of the tissue. Based on these criteria, each cell was classified as positive or negative and depending on intensity of the nuclear stain, positive cells were further categorized into low-positive, medium-positive, or high-positive. For each sample, we estimated the mean percentage of stain-positive cells (at any intensity) across the cores, by weighting each core by its total cell count. Results are aggregated per animal and expressed as mean per group  $\pm$  SD. Statistical differences between experimental and control groups were measured by the two-tailed Student t-test.

**Statistical analysis.** The  $\text{IC}_{50}$  values of the cell lines were compared using a one-way analysis of variance. Grouped mean  $\text{IC}_{50}$  values were compared using two-tailed Student's t-test. All statistical analysis was performed using Prism 6 software (GraphPad Prism Software Inc., San Diego, CA). \*P value  $< 0.05$  was considered statistically significant.



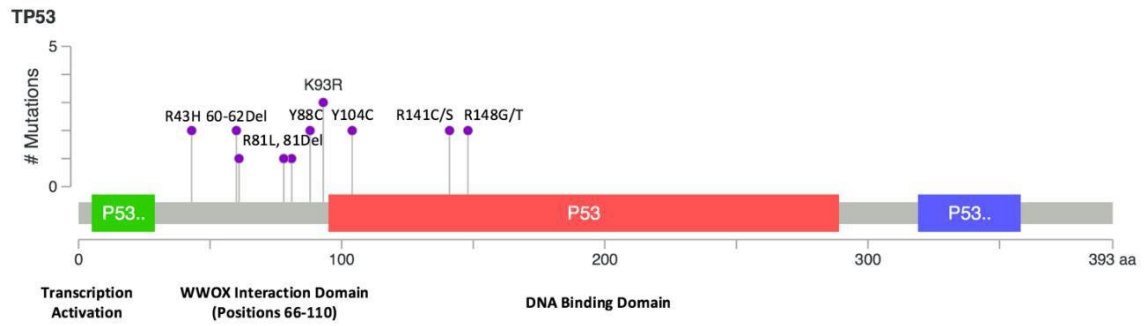

**Fig. S1.** Recurrent TP53 Mutations. Locations of recurrent TP53 mutation were mapped to corresponding protein domains. Mutations cluster near the WWOX (WOX1) interaction domain, a protein required for TP53 activation and apoptosis induction.

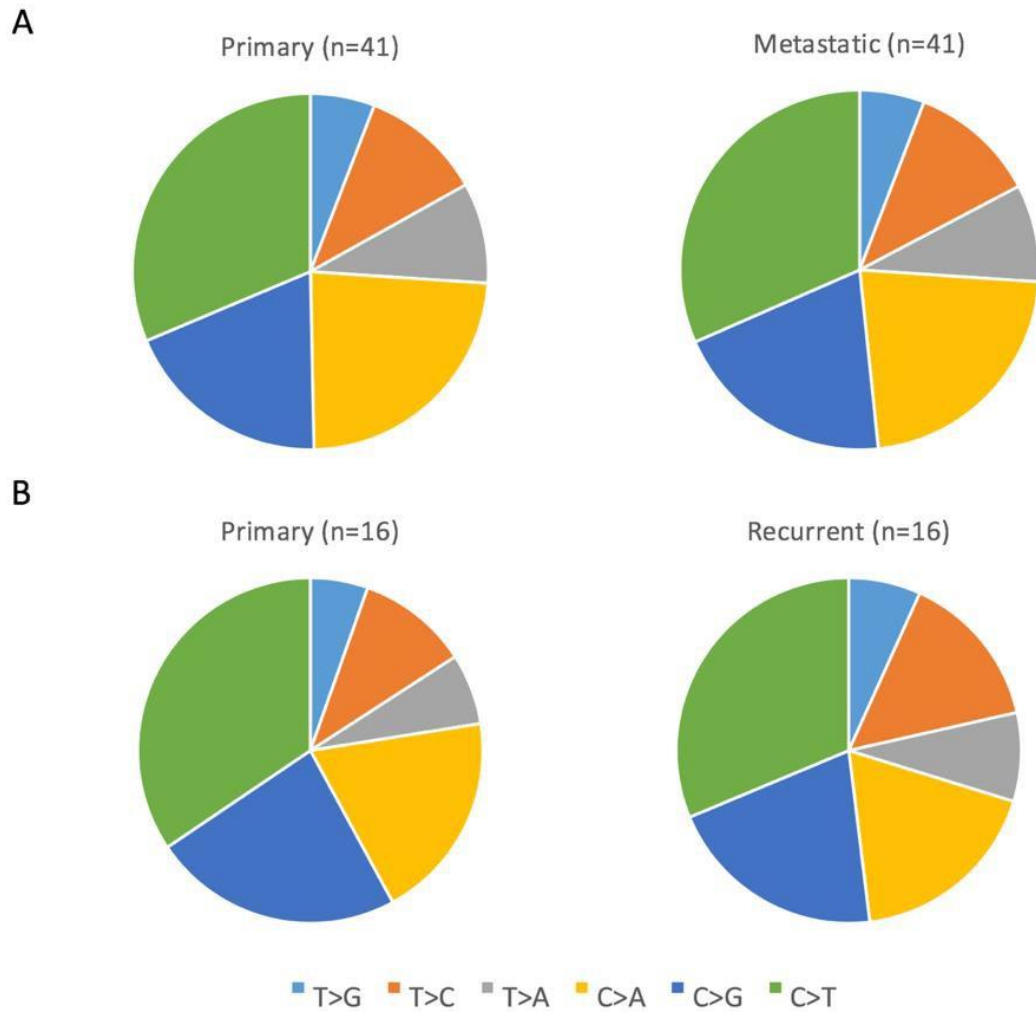

**Fig. S2.** Mutation Signature Analysis of Matched Tumors. Mutation signature in matched pairs of primary and metastatic tumors (A), as well as primary and recurrent tumors (B), were compared to evaluate mutation signature changes through tumor progression while controlling for differences between patients. Tumors contained nearly identical mutation signatures between primary and metastatic as well as primary and recurrent settings.

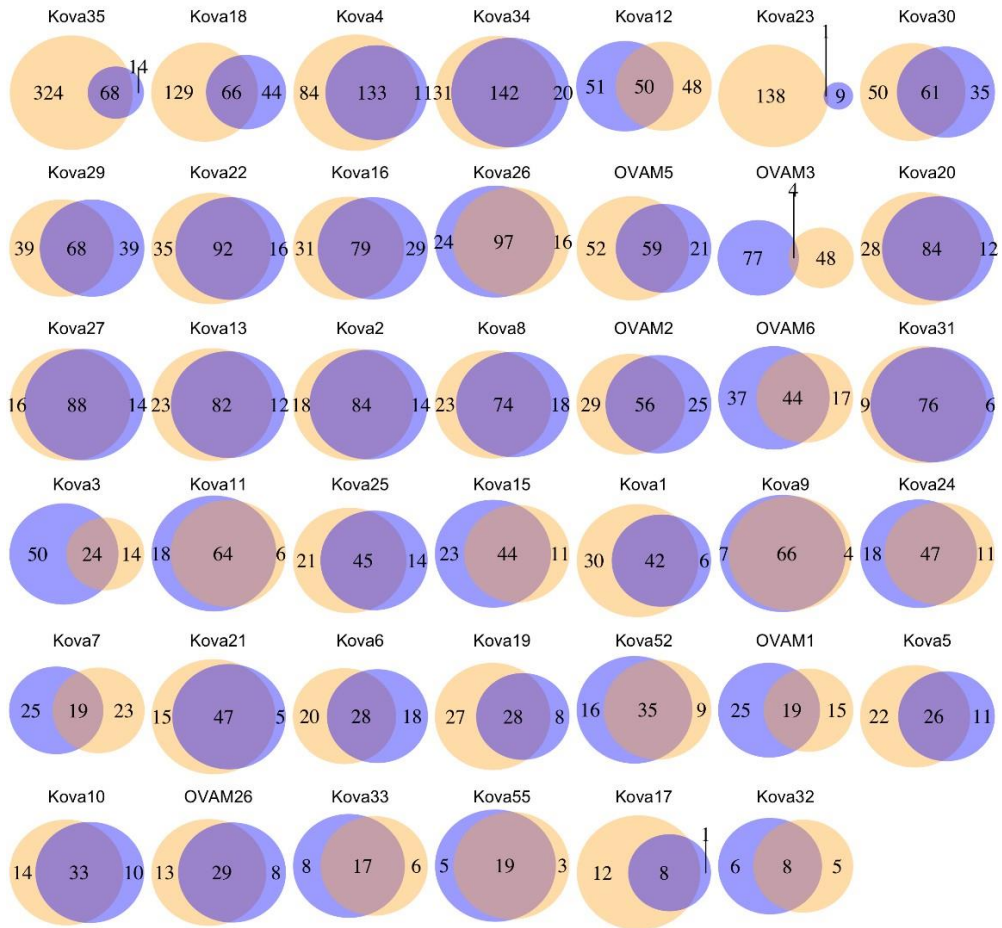

**Fig. S3.** Mutations in Primary and Metastatic ovarian cancers. Venn diagrams present the total number of somatic exonic mutations unique to primary/metastatic ovarian tumors or shared between the matched tumors.



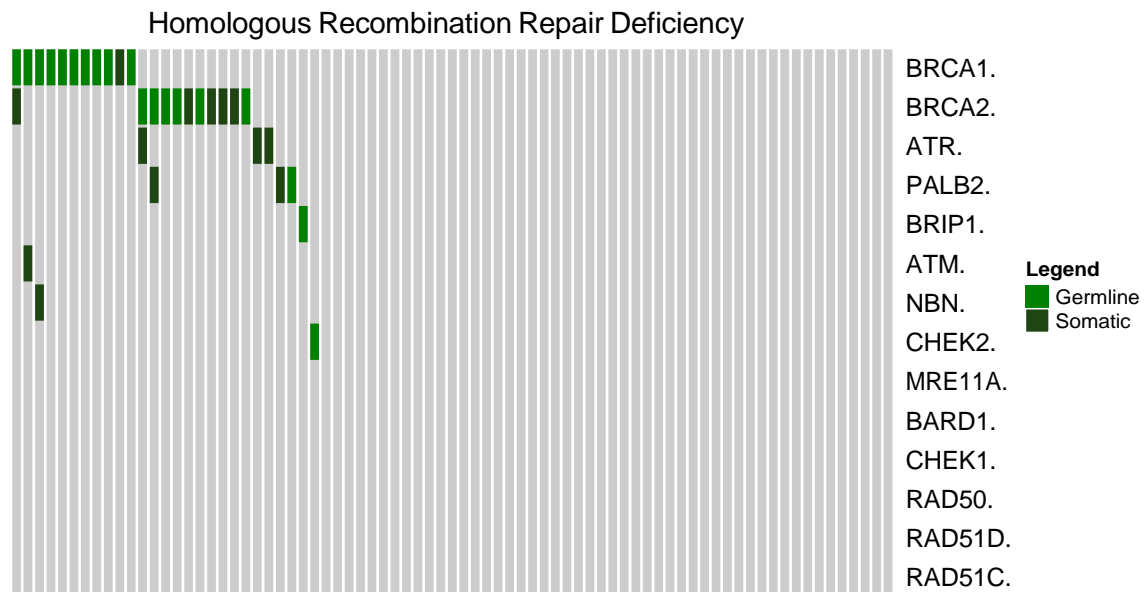

**Fig. S4.** Distribution of Homologous Recombination Mutations. Each patient in the cohort, represented by columns, was analyzed for known pathogenic germline mutations and indels (Light Green). Somatic mutation markers (Dark Green) indicate the presence of a somatic mutation in an HRR gene in at least one setting.

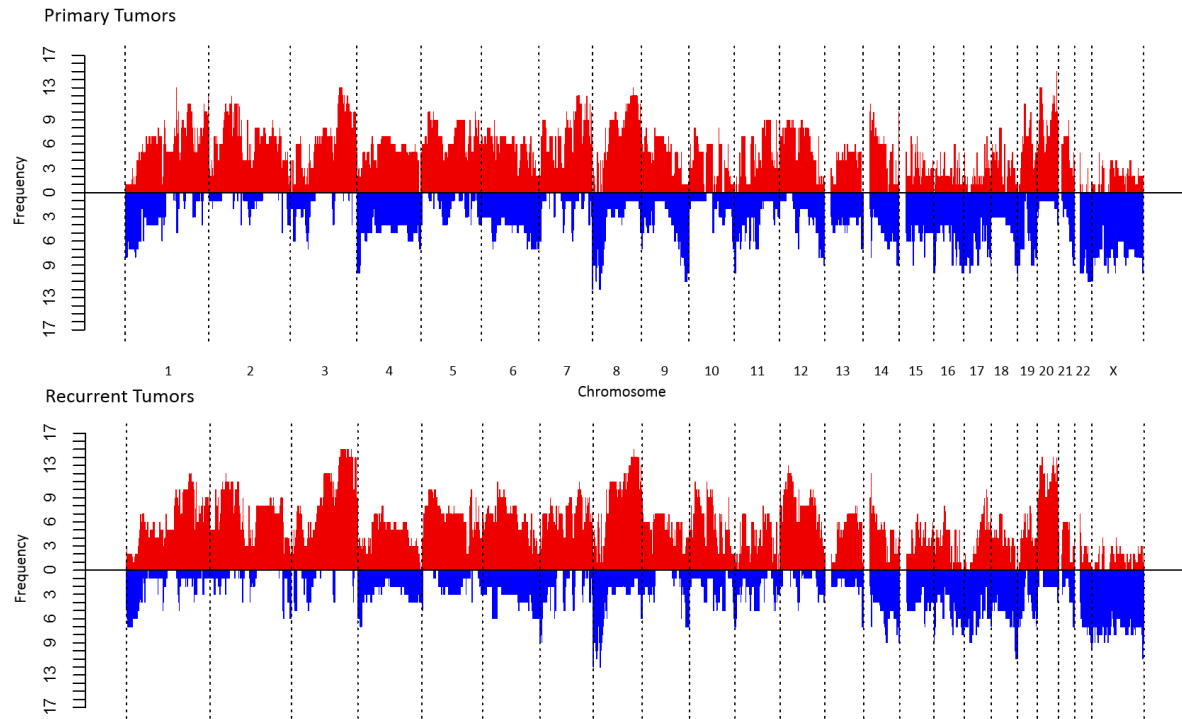

**Fig. S5a. Copy number variation profiles among recurrent and their paired primary tumors.**

Copy number variations across the genome for 17 paired primary and recurrent samples. Copy number variations were de-noised and segmented with a CBS algorithm. Segments with CNVs were plotted across the entire genome (red= gain; blue= loss).

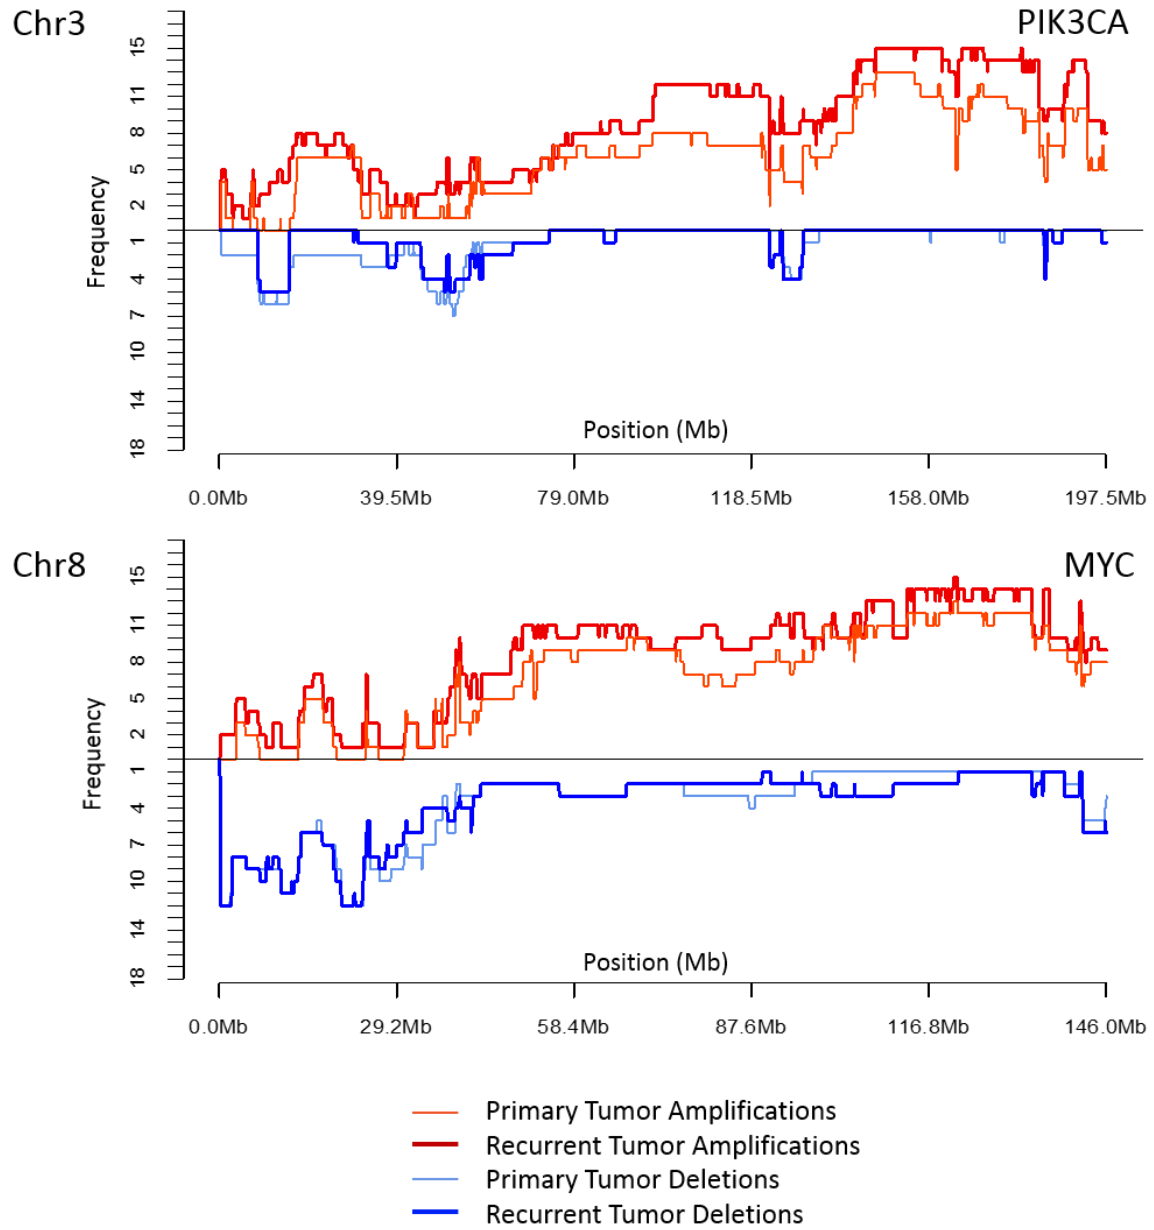

**Fig. S5b. Chromosome copy number variation profiles for recurrent and paired primary samples.** Detailed copy number variation profiles for recurrent and paired primary samples in Chromosome 3, harboring PIK3CA, and Chromosome 8, harboring C-MYC, are shown.

## PIK3CA

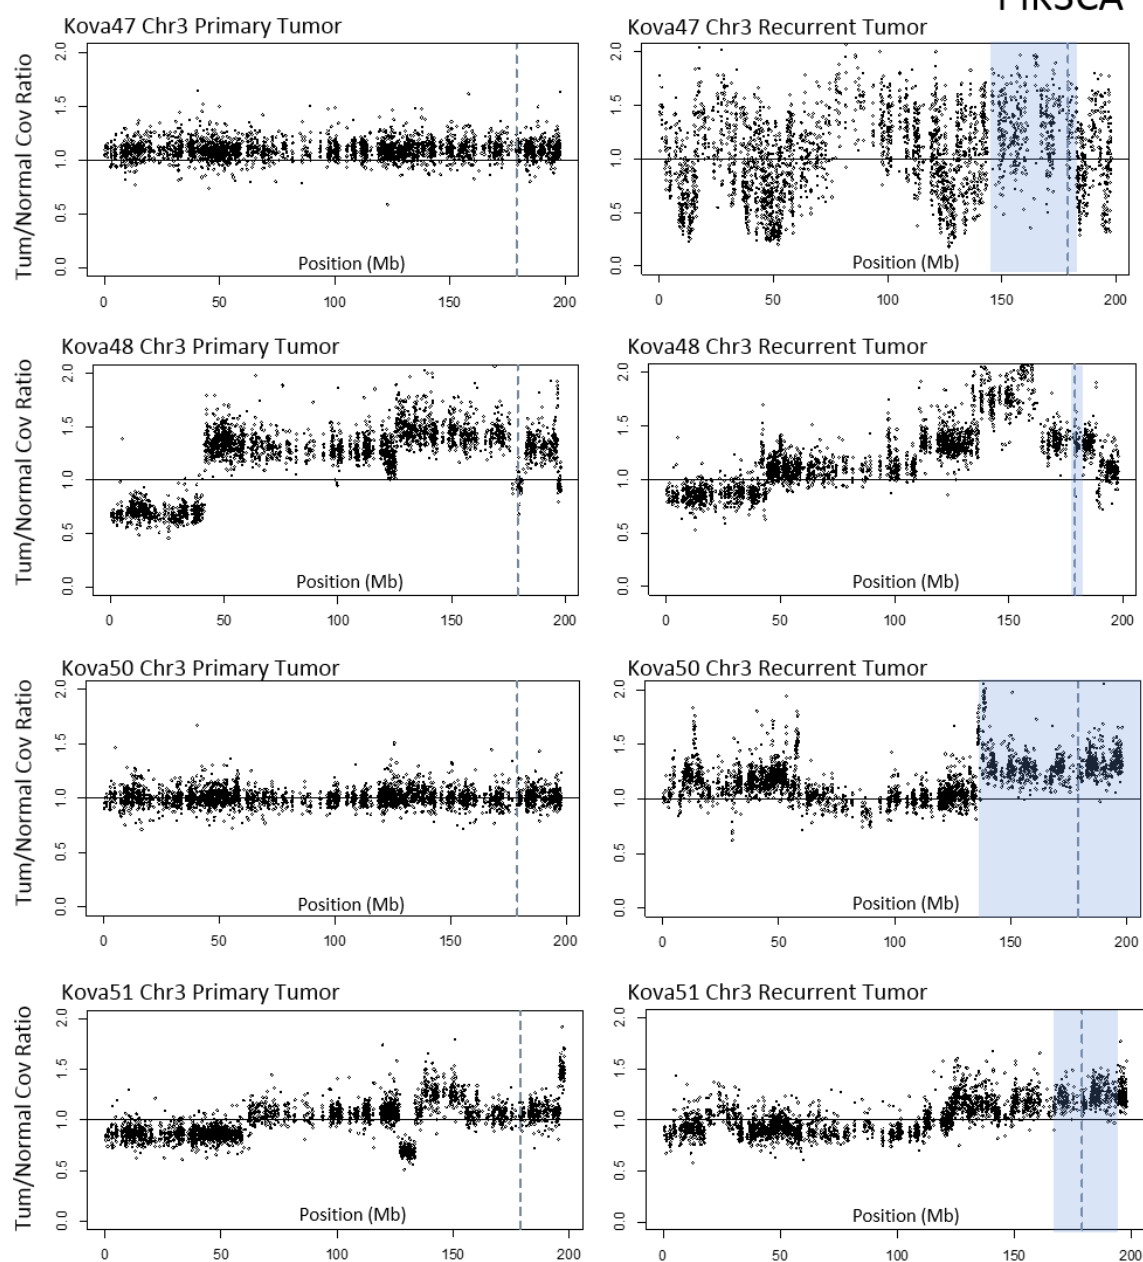

**Fig. S5c. Coverage Ratio in CNV Gains in Recurrence.** Tumor/Normal Coverage ratios were analyzed across chromosomes 3, covering PIK3CA amplifications in patients with called CNV gains in recurrence. Coverage ratios were normalized to mean coverage depth of each exome.

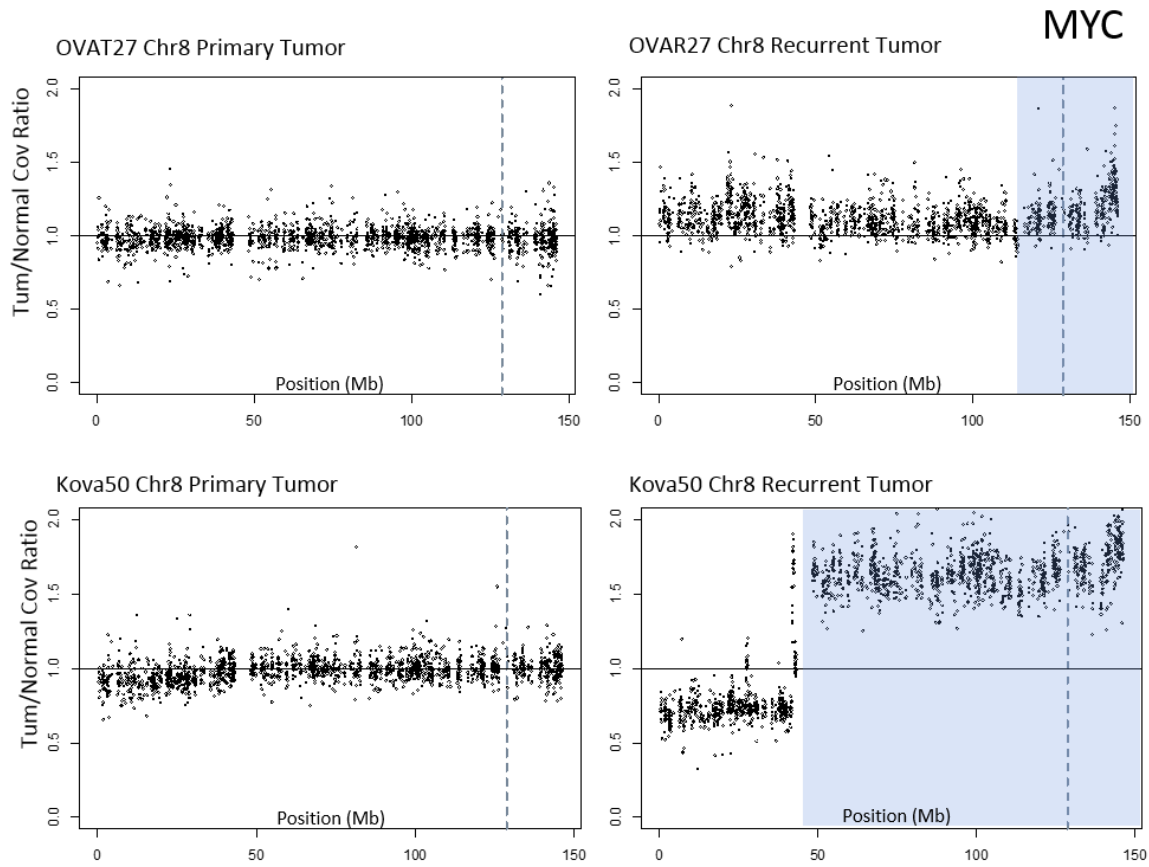

**Fig. S5d. Coverage Ratio in CNV Gains in Recurrence.** Tumor/Normal Coverage ratios were analyzed across chromosomes 8 covering MYC amplifications in patients with called CNV gains in recurrence. Coverage ratios were normalized to mean coverage depth of each exome.

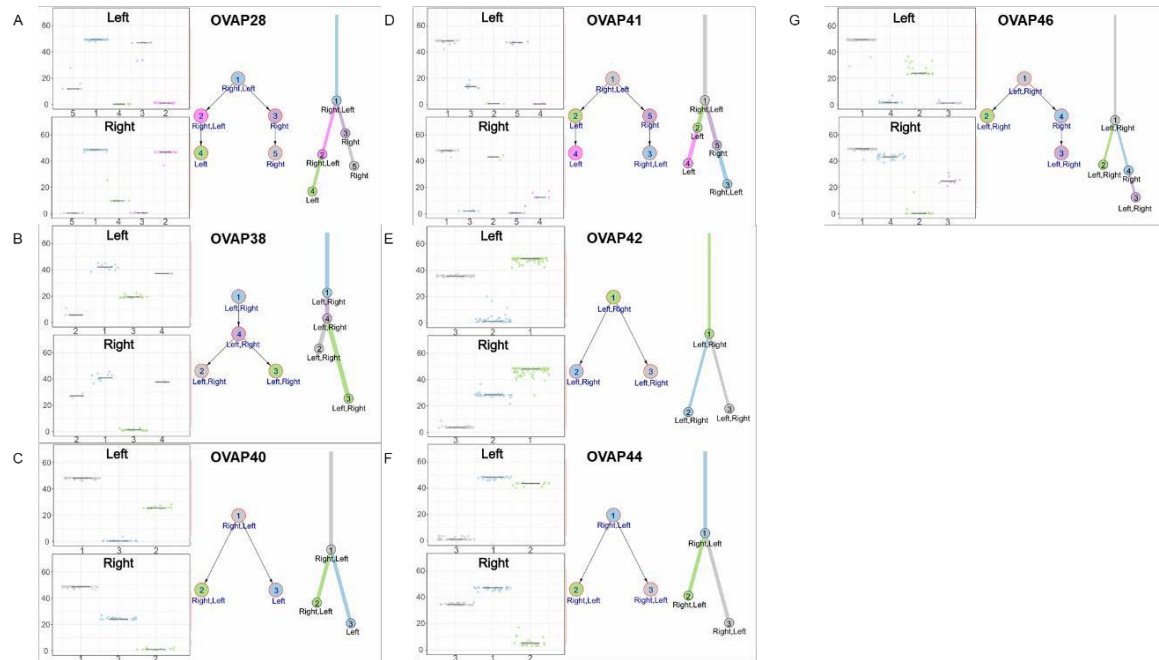

**Fig. S6.** Clustering of subclones and clonal evolution inference in SBOC. (A-G) Left: clusters of variants based on the variant allele fraction (VAF) in left and right ovarian tumors. Points represent the VAFs of each variant in each cluster. Middle: node-based clonal evolution trees. Right: branch-based clonal evolution trees. Branch lengths represent the number of somatic variants in the clusters.

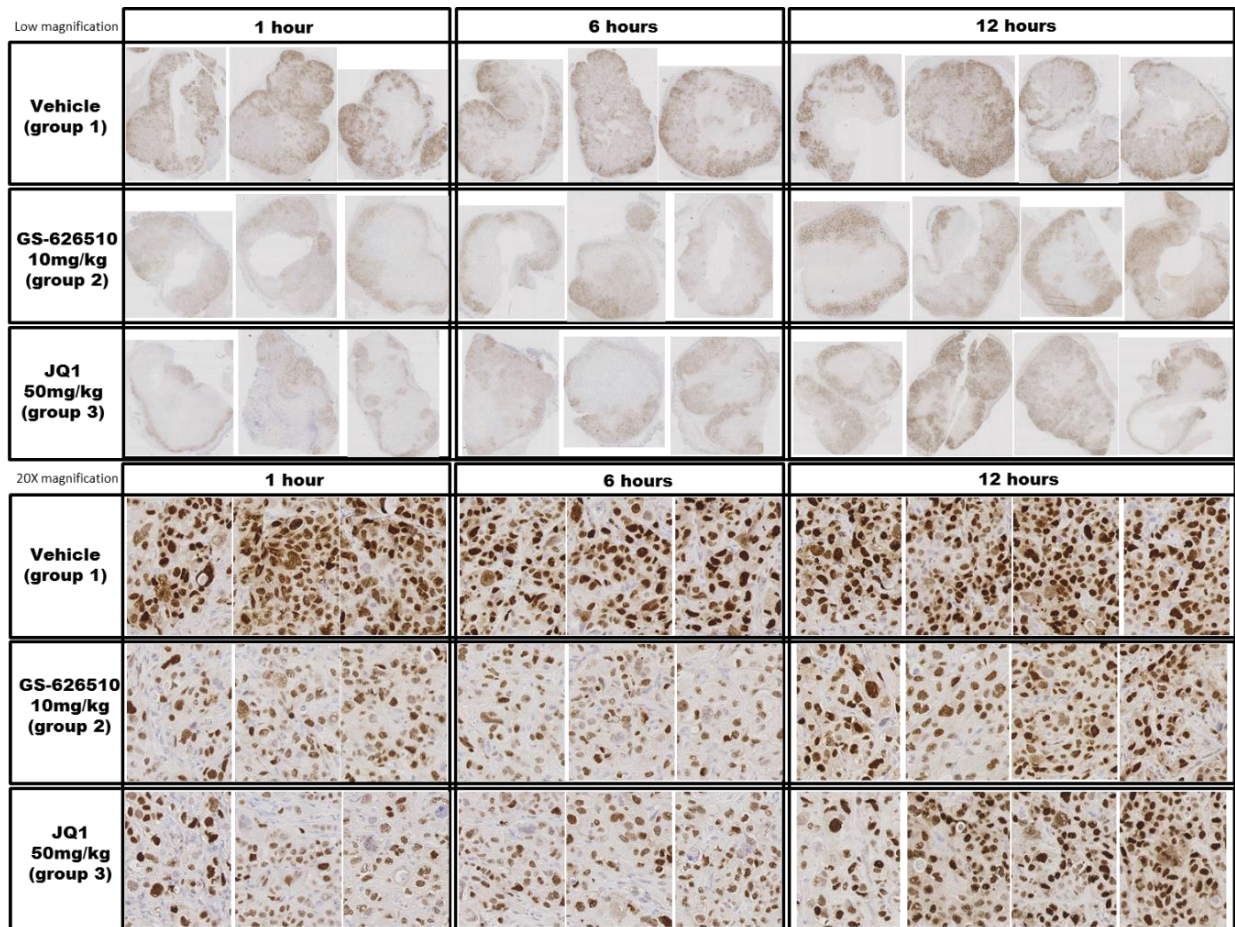

**Fig. S7.** Ex vivo c-Myc expression assessed by IHC on the OSC-KRCH31 xenograft tumor samples, excised 1 hour, 6 hours and 12 hours after the last dose of GS-626510 at 10 mg/kg, JQ1 at 50 mg/kg and vehicle for oral gavage studies, following 21 days of treatment.

**Table S1. Clinical features of primary, metastatic and recurrent ovarian cancer samples (n=90) used for WES and primary cell lines and xenografts used for in vitro and in vivo experiments with GS-626510.**

|                  |           |      |    |   |
|------------------|-----------|------|----|---|
| kova 1-ovaM_1    | OSPC      | IIIC | G3 | W |
| kova 2-ovaM_2    | OSPC      | IIIC | G3 | W |
| kova 3- ovaM_3   | OSPC      | IIIC | G3 | W |
| kova 4- ovaM_4   | OSPC      | IIIC | G3 | W |
| kova 5- ovaM_5   | CC        | IV   | G3 | W |
| kova 6- ovaM_6   | OSPC      | IIIC | G3 | W |
| kova 7- ovaM_7   | OSPC      | IIIC | G3 | W |
| kova 8- ovaM_8   | OSPC EAC* | IIIC | G3 | W |
| kova 9- ovaM_9   | OSPC      | IIIC | G3 | W |
| kova 10- ovaM_10 | OSPC      | IIIC | G3 | W |
| kova 11-ovaM_11  | OSPC      | IIIC | G3 | W |
| kova 12-ovaM_12  | OSPC      | IIIC | G3 | W |
| kova 13- ova_M13 | OSPC      | IIIC | G3 | W |
| kova 15- ovaM_15 | OSPC      | IIIB | G2 | W |
| kova 16- ovaM_16 | OSPC EAC* | IIIC | G3 | W |
| kova 17-ovaM_17  | OSPC      | IIIA | G2 | W |
| kova 18-ovaM_18  | OSPC      | IIIC | G3 | W |
| kova 19-ovaM_19  | EAC       | IIIC | G3 | W |
| kova 20-ovaM_20  | OSPC      | IV   | G3 | W |
| kova 21-ovaM_21  | ACA       | IV   | G3 | W |
| kova 22-ovaM_22  | OSPC      | IV   | G3 | W |
| kova 23-ovaM_23  | ACA       | IIIC | G3 | W |
| kova 24-ovaM_24  | OSPC      | IIIC | G3 | W |
| kova 25-ovaM_25  | OSPC      | IV   | G3 | W |
| kova 26-ovaM_26  | OSPC      | IV   | G3 | W |
| kova 27-ovaM_27  | OSPC      | IIIC | G3 | W |
| kova 29-ovaM_29  | OSPC      | IIIC | G3 | W |
| kova 30-ovaM_30  | OSPC      | IIIC | G3 | W |
| kova 31-ovaM_31  | CC        | IIIC | G3 | W |
| kova 32-ovaM_32  | OSPC      | IV   | G2 | W |
| kova 33-ovaM_33  | OSPC      | IIIC | G3 | W |
| kova 34-ovaM_34  | EAC       | IV   | G3 | W |
| kova 35-ovaM_35  | EAC       | IIIC | G3 | W |
| kova 28L-R       | OSPC      | IIIC | G3 | W |
| kova 36L-R       | OSPC      | IIIC | G3 | W |
| kova 37L-R       | EAC       | IIIA | G2 | W |
| kova 38L-R       | OSPC      | IIIC | G3 | W |
| kova 39L-R       | EAC       | IIC  | G3 | W |

|                                                                                     |                             |
|-------------------------------------------------------------------------------------|-----------------------------|
|  | primary and meta            |
|  | primary L/R                 |
|  | primary, recurrent          |
|  | primary, recurrent and meta |
|  | primary L/R, recurrent      |
|  | Primary Only                |
|  | meta                        |

\*MIXED

|       |                  |      |
|-------|------------------|------|
| OSPC  | serous papillary | 71%  |
| CC    | clear cell       | 6,5% |
| EAC   | Endometrioid     | 6,5% |
| ACA   | Dedifferentiated | 2,6% |
| MIXED | Mixed histology  | 13%  |

Percentages may not sum to 100 due to rounding



|                         |              |      |    |   |
|-------------------------|--------------|------|----|---|
| kova 40L-R              | OSPC EAC*    | IIC  | G3 | W |
| kova 41L-R              | OSPC EAC*    | IIIC | G3 | W |
| kova 42L-R              | OSPC         | IIC  | G3 | W |
| kova 43L-R              | OSPC         | IIIC | G3 | W |
| kova 44L-R              | OSPC EAC*    | IIIC | G3 | W |
| kova 45L-R              | OSPC         | IIIC | G2 | W |
| kova 46L-R              | OSPC         | IIIC | G3 | W |
| kova 47-ovaR_47         | OSPC         | IIIC | G2 | W |
| kova 48-ovaR_48         | OSPC         | IIIC | G3 | W |
| kova 49-ovaR_49         | OSPC         | III  | G3 | W |
| kova 50-ovaR_50         | CC           | IIC  | G3 | W |
| kova 51-ovaR_51         | OSPC         | IIIC | G3 | W |
| kova 52-ovaM_52-ova_R52 | OSPC         | III  | G3 | W |
| kova 53L-R- ovaR-53     | CC EAC*      | IIIC | G3 | W |
| kova 54-ovaR_54         | OSPC         | IV   | G3 | W |
| kova 55-ovaM 55-ova_R55 | OSPC         | IIIC | G3 | W |
| kova 56-ovaR_56         | CC           | IIIC | G3 | W |
| kova 57-ovaR_57         | OSPC         | IIIC | G3 | W |
| kova 58-ovaR_58         | OSPC         | IIB  | G3 | W |
| kova 59-ovaR_59         | OSPC         | IIIC | G3 | W |
| kova 60-ovaR_60         | OSPC         | IIIC | G3 | W |
| OVAT1-OVAM1             | OSPC         | IIIC | G3 | W |
| OVAT2-OVAM2             | OSPC         | IIIB | G3 | W |
| OVAT3-OVAM3             | OSPC         | IIIC | G3 | W |
| OVAT4                   | OSPC         | IV   | G3 | W |
| OVAT5-OVAM5             | OSPC         | IIIC | G3 | W |
| OVAT6-OVAM6             | OSPC         | IIIC | G3 | W |
| OVAT7                   | OSPC         | IIIC | G3 | W |
| OVAT8                   | OSPC         | IIIC | G3 | W |
| OVAT9                   | OSPC CC*     | IIIC | G3 | W |
| OVAT10                  | OSPC EAC*    | IIIA | G3 | W |
| OVAT11                  | OSPC CC EAC* | IIIC | G3 | H |
| OVAT12-OVAR12           | OSPC CC*     | IIIC | G3 | W |
| OVAT25                  | OSPC         | IV   | G3 | W |
| OVAT26-OVAM26           | OSPC         | IV   | G3 | O |
| OVAT27-OVAR27           | OSPC         | IIC  | G3 | W |
| OVAT29                  | OSPC         | IIIC | G3 | W |

**Cell lines**

| PATIENT CODE | HISTOLOGY | STAGE | GRADE | RACE |
|--------------|-----------|-------|-------|------|
| OVA10        | CC        | IIC   | G3    | W    |
| OSC-KRCH31   | OSPC      | IV    | G3    | W    |

**PDX**

| PATIENT CODE | HISTOLOGY | STAGE | GRADE | RACE |
|--------------|-----------|-------|-------|------|
| OSC-OMM78    | OSPC      | IIIC  | G3    | W    |

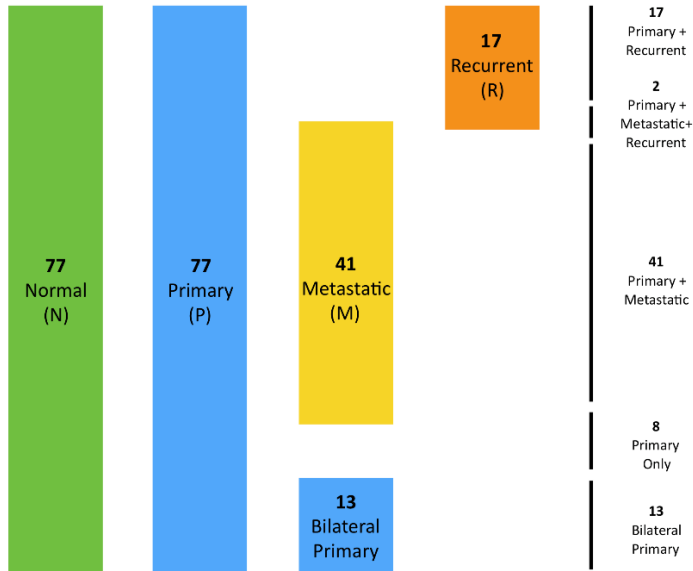

**Table S2. Sequencing metrics for tumor samples and matched normal samples.** \*One primary sample was excluded from the final analysis secondary to low purity.

| <b>Tumor Type</b>               | <b>Normal</b> | <b>Primary</b> | <b>Metastatic</b> | <b>Recurrent</b> |
|---------------------------------|---------------|----------------|-------------------|------------------|
| <b>Number</b>                   | <b>77</b>     | <b>91*</b>     | <b>41</b>         | <b>17</b>        |
| Read length:                    | 74            | 74             | 74                | 74               |
| Reads per lane:                 | 100           | 191            | 205               | 189              |
| Mean coverage:                  | 101           | 186            | 197               | 183              |
| Median coverage:                | 85            | 152            | 164               | 146              |
| % Reads on-target:              | 70.90         | 68.82          | 68.19             | 68.24            |
| % Bases on-target:              | 60.07         | 58.25          | 57.65             | 57.69            |
| % of bases covered at least 4x  | 97.72         | 98.28          | 98.23             | 98.21            |
| % of bases covered at least 10x | 95.56         | 96.96          | 96.84             | 96.67            |
| % of bases covered at least 20x | 91.06         | 94.58          | 94.42             | 93.83            |
| Mean error rate:                | 29.74%        | 39.30%         | 39.71%            | 35.88%           |
| PCR duplicates (%):             | 4.88          | 6.08           | 6.86              | 5.32             |

**Table S3. TP53 Somatic Mutations in Primary Tumors**

| Histology | PatientID | Position | Ref>Alt               | AACChange | MutationType           | RefReads | NonRefReads |
|-----------|-----------|----------|-----------------------|-----------|------------------------|----------|-------------|
| EAC       | kova35    | 7578406  | C>T                   | R43H      | nonsynonymous SNV      | 9        | 45          |
| EAC       | kova34    | 7578190  | T>C                   | Y88C      | nonsynonymous SNV      | 61       | 178         |
| OSPC      | kova49    | 7577022  | G>A                   | R174X     | stopgain               | 125      | 41          |
| ACA       | kova23    | 7577570  | C>T                   | M105I     | nonsynonymous SNV      | 189      | 44          |
| OSPC      | kova42    | 7579542  | CGTCCGGGGACAGCATCAA>- | L4fs      | frameshift deletion    | 53       | 37          |
| OSPC      | kova46    | 7576852  | C>T                   | NA        | splicing               | 100      | 71          |
| OSPC      | kova22    | 7577536  | T>A                   | R117W     | nonsynonymous SNV      | 59       | 102         |
| OSPC      | ovat5     | 7578210  | TCGAAAAGTGTT>-        | 78_81del  | nonframeshift deletion | 119      | 126         |
| OSPC      | kova30    | 7579528  | C>T                   | W14X      | stopgain               | 6        | 61          |
| OSPC      | kova26    | 7579369  | G>C                   | S67R      | nonsynonymous SNV      | 29       | 44          |
| OSPC      | kova59    | 7577121  | G>A                   | R141C     | nonsynonymous SNV      | 37       | 108         |
| OSPC EAC  | kova16    | 7578236  | A>G                   | Y73H      | nonsynonymous SNV      | 53       | 125         |
| OSPC      | kova20    | 7577124  | C>A                   | V140L     | nonsynonymous SNV      | 63       | 76          |
| OSPC EAC  | ovat10    | 7574030  | G>-                   | R201fs    | frameshift deletion    | 67       | 16          |
| OSPC      | kova13    | 7577100  | T>C                   | R148G     | nonsynonymous SNV      | 63       | 135         |
| OSPC      | kova48    | 7574021  | C>-                   | E204fs    | frameshift deletion    | 4        | 52          |
| OSPC      | kova2     | 7579368  | A>-                   | Y68fs     | frameshift deletion    | 23       | 36          |
| OSPC      | kova58    | 7578550  | G>A                   | S88F      | nonsynonymous SNV      | 16       | 99          |
| OSPC      | kova27    | 7578406  | C>T                   | R43H      | nonsynonymous SNV      | 6        | 50          |
| OSPC EAC  | kova8     | 7578541  | A>T                   | L91H      | nonsynonymous SNV      | 8        | 68          |
| OSPC      | kova12    | 7578271  | TGC>-                 | 60_61del  | nonframeshift deletion | 29       | 118         |
| OSPC      | kova12    | 7578273  | ->AA                  | Q60fs     | frameshift insertion   | 28       | 118         |
| OSPC      | ovat2     | 7577551  | C>A                   | G112C     | nonsynonymous SNV      | 78       | 73          |
| CC        | kova31    | 7578211  | C>A                   | R81L      | nonsynonymous SNV      | 104      | 188         |
| OSPC EAC  | kova44    | 7577574  | T>C                   | Y104C     | nonsynonymous SNV      | 29       | 192         |
| OSPC      | kova57    | 7577539  | G>A                   | R116W     | nonsynonymous SNV      | 30       | 79          |
| OSPC      | kova11    | 7578535  | T>C                   | K93R      | nonsynonymous SNV      | 10       | 8           |
| OSPC      | Kova1     | 7579349  | A>C                   | F74C      | nonsynonymous SNV      | 11       | 61          |
| OSPC EAC  | kova40    | 7578449  | C>T                   | A29T      | nonsynonymous SNV      | 6        | 46          |
| OSPC      | kova9     | 7579316  | ->A                   | C85fs     | frameshift insertion   | 16       | 32          |
| OSPC      | kova25    | 7578535  | T>C                   | K93R      | nonsynonymous SNV      | 17       | 63          |
| ACA       | kova21    | 7577106  | G>C                   | P146A     | nonsynonymous SNV      | 2        | 141         |
| OSPC      | kova28    | 7578535  | T>C                   | K93R      | nonsynonymous SNV      | 10       | 96          |
| OSPC      | ovat6     | 7577018  | C>A                   | NA        | splicing               | 112      | 37          |
| OSPC      | kova15    | 7577121  | G>T                   | R141S     | nonsynonymous SNV      | 81       | 75          |
| OSPC      | kova45    | 7577082  | C>-                   | E154fs    | frameshift deletion    | 21       | 104         |
| EAC       | kova19    | 7578427  | T>C                   | H36R      | nonsynonymous SNV      | 41       | 11          |
| OSPC      | kova54    | 7578188  | C>A                   | E89X      | stopgain               | 159      | 153         |
| OSPC      | kova6     | 7578442  | T>C                   | Y31C      | nonsynonymous SNV      | 11       | 36          |

|          |        |         |      |       |                     |     |     |
|----------|--------|---------|------|-------|---------------------|-----|-----|
| OSPC CC  | ovat12 | 7574012 | C>A  | E207X | stopgain            | 28  | 35  |
| OSPC     | ovat8  | 7578483 | G>-  | S17fs | frameshift deletion | 86  | 43  |
| CC       | kova5  | 7577099 | C>G  | R148T | nonsynonymous SNV   | 79  | 89  |
| OSPC     | kova52 | 7578370 | C>G  | NA    | splicing            | 49  | 9   |
| OSPC     | kova10 | 7578382 | G>C  | S51X  | stopgain            | 15  | 37  |
| OSPC     | ovat26 | 7578291 | T>C  | NA    | splicing            | 77  | 158 |
| OSPC     | kova38 | 7577058 | C>A  | E162X | stopgain            | 3   | 137 |
| OSPC EAC | kova41 | 7578413 | C>T  | V41M  | nonsynonymous SNV   | 26  | 21  |
| OSPC     | kova7  | 7577547 | C>A  | G113V | nonsynonymous SNV   | 15  | 101 |
| EAC      | kova39 | 7578440 | T>C  | K32E  | nonsynonymous SNV   | 41  | 42  |
| OSPC     | kova3  | 7578222 | TC>- | R77fs | frameshift deletion | 111 | 10  |
| OSPC     | Kova36 | 7577142 | C>A  | G134X | stopgain            | 107 | 49  |
| OSPC     | kova33 | 7577572 | T>C  | M105V | nonsynonymous SNV   | 170 | 50  |
| OSPC     | kova33 | 7578190 | T>C  | Y88C  | nonsynonymous SNV   | 263 | 112 |
| OSPC     | kova55 | 7577574 | T>C  | Y104C | nonsynonymous SNV   | 26  | 38  |
| OSPC     | ovat27 | 7578271 | T>C  | H61R  | nonsynonymous SNV   | 191 | 27  |
| OSPC     | kova17 | 7578203 | C>A  | V84L  | nonsynonymous SNV   | 13  | 218 |
| OSPC     | kova4  | 7577538 | C>T  | R116Q | nonsynonymous SNV   | 13  | 155 |
| OSPC     | kova18 | 7578406 | C>T  | R43H  | nonsynonymous SNV   | 10  | 41  |
| OSPC     | ovat7  | 7577120 | C>T  | R141H | nonsynonymous SNV   | 63  | 107 |
| OSPC     | kova29 | 7577120 | C>T  | R141H | nonsynonymous SNV   | 44  | 174 |
| OSPC     | kova51 | 7577120 | C>T  | R141H | nonsynonymous SNV   | 41  | 65  |
| OSPC CC  | ovat9  | 7577538 | C>T  | R116Q | nonsynonymous SNV   | 90  | 42  |
| OSPC     | kova24 | 7577094 | G>A  | R150W | nonsynonymous SNV   | 167 | 31  |
| OSPC     | kova60 | 7577120 | C>T  | R141H | nonsynonymous SNV   | 57  | 62  |
| OSPC     | ovat3  | 7578212 | G>A  | R81X  | nonsynonymous SNV   | 90  | 148 |
| OSPC     | ovat4  | 7577094 | G>A  | R150W | nonsynonymous SNV   | 17  | 84  |
| OSPC     | ovat1  | 7578206 | T>C  | S83G  | nonsynonymous SNV   | 34  | 244 |
| OSPC     | ovat29 | 7579480 | G>-  | A69fs | frameshift deletion | 86  | 18  |

**Table S4. Mismatch repair mutations. Tumors with mismatch repair gene mutations contained significantly higher somatic mutation burdens than tumors without mismatch repair gene mutations.**

| <b>Primary</b>    |                          |                      |
|-------------------|--------------------------|----------------------|
| <b>TumorID</b>    | <b>Somatic Mutations</b> | <b>Mutated Gene</b>  |
| Kova53-Left       | 1267                     | MSH2(x2), MSH3, PMS1 |
| Kova53-Right      | 263                      | MSH2, PMS1           |
| Kova35            | 108                      | MLH1                 |
| OVAT6             | 57                       | MLH3                 |
| Kova16            | 98                       | MLH3                 |
| Kova1             | 70                       | MSH3                 |
| Kova34            | 160                      | MSH3                 |
| Kova31            | 80                       | PMS1                 |
| <b>Metastatic</b> |                          |                      |
| <b>TumorID</b>    | <b>Somatic Mutations</b> | <b>Mutated Gene</b>  |
| Kova16            | 99                       | MLH3                 |
| OVAT6             | 76                       | MLH3                 |
| Kova34            | 147                      | MSH3                 |
| Kova31            | 79                       | PMS1                 |

**Table S5. PIK3CA mutations. Pathogenic mutations indicate evidence of clinical pathogenicity. “Known Gain of Function” mutations have been functionally characterized as oncogenic gain of function in previously published *in vitro* studies.**

| <b>Patient</b>    | <b>Mutation</b>              | <b>Deleteriousness</b> |
|-------------------|------------------------------|------------------------|
| <b>Primary</b>    | <b>6.5% (5/77 Patients)</b>  |                        |
| Kova5             | E542K                        | Pathogenic             |
| OVAT8             | N345K                        | Known Gain of Function |
| Kova37-Right      | C420R                        | Known Gain of Function |
| Kova37-Right+Left | G106V                        | Known Gain of Function |
| Kova53-Left       | R93Q                         | Known Gain of Function |
| Kova53-Left       | V334M                        |                        |
| Kova56            | H1047R                       | Pathogenic             |
| <b>Metastatic</b> | <b>4.9% (2/41 Patients)</b>  |                        |
| Kova5             | E542K                        | Pathogenic             |
| OVAT8             | N345K                        | Known Gain of Function |
| <b>Recurrent</b>  | <b>17.6% (3/17 Patients)</b> |                        |
| Kova50            | E545K                        | Pathogenic             |
| Kova53            | R93Q                         | Known Gain of Function |
| Kova53            | H1047R                       | Pathogenic             |
| Kova53            | V334M                        |                        |
| Kova56            | H1047R                       | Pathogenic             |

**Table S6a. Key recurrent CNVs. The most significant recurrent CNVs, as found by the GISTIC algorithm, were compared in primary, metastatic, and recurrent settings for relative prevalence. Putative genes for each CNV were determined based on cancer genes found within the recurrently mutated regions as well as known associations between CNVs and driver genes.**

| Putative Gene         | Location | Primary<br>(n=77) | Affected | Metastatic<br>(n=41) | Affected | Recurrent<br>(n=17) | Affected |
|-----------------------|----------|-------------------|----------|----------------------|----------|---------------------|----------|
| <b>Amplifications</b> |          |                   |          |                      |          |                     |          |
| PIK3CA                | 3q26.1   | 53                | 68.83%   | 29                   | 70.73%   | 15                  | 88.24%   |
| MYC                   | 8q24.3   | 57                | 74.03%   | 32                   | 78.05%   | 14                  | 82.35%   |
|                       | 14q11.2  | 44                | 57.14%   | 25                   | 60.98%   | 12                  | 70.59%   |
| <b>Deletions</b>      |          |                   |          |                      |          |                     |          |
| RPI22, ARID1A         | 1p36     | 41                | 53.25%   | 24                   | 58.54%   | 9                   | 52.94%   |
| VHL                   | 3p25.3   | 35                | 45.45%   | 20                   | 48.78%   | 8                   | 47.06%   |
| FGFR3 CRIPAK          | 4p16.1   | 39                | 50.65%   | 24                   | 58.54%   | 8                   | 47.06%   |
| CARD11                | 7p22.3   | 41                | 53.25%   | 31                   | 75.61%   | 9                   | 52.94%   |
| EGR3                  | 8p21     | 52                | 67.53%   | 27                   | 65.85%   | 14                  | 82.35%   |
| NOTCH1                | 9q34     | 49                | 63.64%   | 27                   | 65.85%   | 10                  | 58.82%   |
| HRAS                  | 11p15.4  | 53                | 68.83%   | 30                   | 73.17%   | 11                  | 64.71%   |
| GNA11 STK11           | 19p13.3  | 61                | 79.22%   | 38                   | 92.68%   | 10                  | 58.82%   |



**Table S6b. CNV Transmission in Matched Recurrent and Primary Tumors.** Amplifications were calculated based on normalized read counts at the PIK3CA and MYC loci in matched pairs of primary and recurrent tumors. Amplifications in recurrent tumors that were not present in their matched primary tumors are indicated in bold.

| Patient | PIK3CA Copy Number |                      | MYC Copy Number |                      |
|---------|--------------------|----------------------|-----------------|----------------------|
|         | Primary            | Recurrent            | Primary         | Recurrent            |
| OVAT12  | Amplification      | Amplification        | Amplification   | Amplification        |
| OVAT27  | Amplification      | Amplification        |                 | <b>Amplification</b> |
| OVAT31  |                    |                      |                 |                      |
| kova_47 |                    | <b>Amplification</b> |                 |                      |
| kova_48 |                    | <b>Amplification</b> | Amplification   | Amplification        |
| kova_49 | Amplification      | Amplification        | Amplification   | Amplification        |
| kova_50 |                    | <b>Amplification</b> |                 | <b>Amplification</b> |
| kova_51 |                    | <b>Amplification</b> | Amplification   | Amplification        |
| kova_52 | Amplification      | Amplification        | Amplification   | Amplification        |
| kova_53 | Amplification      | Amplification        |                 |                      |
| kova_54 |                    |                      | Amplification   | Amplification        |
| kova_55 | Amplification      | Amplification        | Amplification   | Amplification        |
| kova_56 | Amplification      | Amplification        | Amplification   | Amplification        |
| kova_57 | Amplification      | Amplification        | Amplification   | Amplification        |
| kova_58 | Amplification      | Amplification        | Amplification   | Amplification        |
| kova_59 | Amplification      | Amplification        | Amplification   | Amplification        |
| kova_60 | Amplification      | Amplification        | Amplification   | Amplification        |

**Table S6c. Genes within key amplification regions.** Amplification boundaries were determined based on the region of amplification in recurrent samples. Genes in the region were counted and cross-referenced with known cancer genes.

| <b>Amplification</b> | <b>Start</b> | <b>End</b> | <b>Genes in Region</b> | <b>Cancer Genes</b>                |
|----------------------|--------------|------------|------------------------|------------------------------------|
| 3q26                 | 142060002    | 178959999  | 282                    | ATR, MECOM, TBL1XR1, <b>PIK3CA</b> |
| 8q23-24              | 105620001    | 139619999  | 178                    | RAD21, <b>MYC</b>                  |
| 14q11                | 22380001     | 22960000   | 60                     |                                    |

**Table S7. Mutation transmission statistics.**

| <b>Primary to Metastatic Transmission (n=41)</b> |                                       |                    |                            |                                                |                    |                            |
|--------------------------------------------------|---------------------------------------|--------------------|----------------------------|------------------------------------------------|--------------------|----------------------------|
|                                                  | <b>Somatic Mutations in all genes</b> |                    |                            | <b>Somatic Mutations in known cancer genes</b> |                    |                            |
|                                                  | <b>Primary specific</b>               | <b>Transmitted</b> | <b>Metastatic specific</b> | <b>Primary specific</b>                        | <b>Transmitted</b> | <b>Metastatic specific</b> |
| <b>MEAN</b>                                      | 36.98                                 | 54.32              | 19.44                      | 0.68                                           | 2.27               | 0.27                       |
| <b>TOTAL</b>                                     | 1516                                  | 2227               | 797                        | 28                                             | 93                 | 11                         |
| <b>%</b>                                         | 40.50%                                | 59.50%             |                            | 23.14%                                         | 76.86%             |                            |

  

| <b>Primary to Recurrent Transmission (n=16)</b> |                                       |                    |                           |                                                |                    |                           |
|-------------------------------------------------|---------------------------------------|--------------------|---------------------------|------------------------------------------------|--------------------|---------------------------|
|                                                 | <b>Somatic Mutations in all genes</b> |                    |                           | <b>Somatic Mutations in known cancer genes</b> |                    |                           |
|                                                 | <b>Primary specific</b>               | <b>Transmitted</b> | <b>Recurrent specific</b> | <b>Primary specific</b>                        | <b>Transmitted</b> | <b>Recurrent specific</b> |
| <b>MEAN</b>                                     | 35.25                                 | 42.06              | 49.75                     | 0.44                                           | 1.81               | 0.75                      |
| <b>TOTAL</b>                                    | 564                                   | 673                | 796                       | 7                                              | 29                 | 12                        |
| <b>%</b>                                        | 45.59%                                | 54.41%             |                           | 19.44%                                         | 80.56%             |                           |

  

| <b>Metastatic to Recurrent Transmission (n=2)</b> |                                       |                    |                           |                                                |                    |                           |
|---------------------------------------------------|---------------------------------------|--------------------|---------------------------|------------------------------------------------|--------------------|---------------------------|
|                                                   | <b>Somatic Mutations in all genes</b> |                    |                           | <b>Somatic Mutations in known cancer genes</b> |                    |                           |
|                                                   | <b>Metastatic specific</b>            | <b>Transmitted</b> | <b>Recurrent specific</b> | <b>Metastatic specific</b>                     | <b>Transmitted</b> | <b>Recurrent specific</b> |
| <b>MEAN</b>                                       | 6.5                                   | 32                 | 36.5                      | 0                                              | 1                  | 0.5                       |
| <b>TOTAL</b>                                      | 13                                    | 64                 | 73                        | 0                                              | 2                  | 1                         |
| <b>%</b>                                          | 16.88%                                | 83.12%             |                           | 0.00%                                          | 100.00%            |                           |

**Table S8a. Pathogenic germline mutations in homologous recombination repair genes. somatic and pathogenic germline variants were analyzed together to estimate the prevalence of homologous recombination repair deficiency. 25% of patients contained either a pathogenic germline mutation or somatic mutation in a homologous recombination repair gene.**

| SampleID      | GeneID | Chrom. | Position | Ref>NonRef | AAChange | SVMscore | SVMpred. | ClinvarAnno |
|---------------|--------|--------|----------|------------|----------|----------|----------|-------------|
| OVAN5         | BRCA1  | 17     | 41243844 | TTTAC>-    | V1187fs  | NA       | NA       | pathogenic  |
| OVAN6         | BRCA1  | 17     | 41276045 | CT>-       | E23fs    | NA       | NA       | pathogenic  |
| kova12CTRneg  | BRCA1  | 17     | 41209079 | ->G        | Q1709fs  | NA       | NA       | pathogenic  |
| kova26CTRneg  | BRCA1  | 17     | 41258504 | A>C        | C61G     | 0.951    | D        | pathogenic  |
| kova29CTRneg  | BRCA1  | 17     | 41243800 | C>A        | E1250X   | .        | .        | pathogenic  |
| kova34CTRneg  | BRCA1  | 17     | 41258504 | A>C        | C61G     | 0.951    | D        | pathogenic  |
| kova3CTRneg   | BRCA1  | 17     | 41245179 | GT>-       | T743fs   | NA       | NA       | pathogenic  |
| kova44CTRneg  | BRCA1  | 17     | 41258495 | A>G        | C64R     | 0.96     | D        | pathogenic  |
| kova51CTRneg  | BRCA1  | 17     | 41243800 | C>A        | E1250X   | .        | .        | pathogenic  |
| kova9CTRneg   | BRCA1  | 17     | 41258495 | A>G        | C64R     | 0.96     | D        | pathogenic  |
| kova20CTRneg  | BRCA2  | 13     | 32911538 | G>T        | E1016X   | .        | .        | pathogenic  |
| kova24CTRneg  | BRCA2  | 13     | 32911240 | T>-        | C916fs   | NA       | NA       | pathogenic  |
| kova30CTRneg  | BRCA2  | 13     | 32929170 | A>T        | R2394X   | .        | .        | pathogenic  |
| kova4CTRneg   | BRCA2  | 13     | 32910537 | TC>-       | I682fs   | NA       | NA       | pathogenic  |
| kova8CTRneg   | BRCA2  | 13     | 32929170 | A>T        | R2394X   | .        | .        | pathogenic  |
| OVAN9         | BRCA2  | 13     | 32914759 | G>-        | E2089fs  | NA       | NA       |             |
| OVAN9         | BRCA2  | 13     | 32914761 | A>-        | H2090fs  | NA       | NA       |             |
| kova595CTRneg | CHEK2  | 22     | 29095917 | C>G        | G306A    | 0.988    | D        | pathogenic  |
| kova41CTRneg  | PALB2  | 16     | 23646550 | C>-        | G439fs   | NA       | NA       | pathogenic  |
| kova57CTRneg  | BRIP1  | 17     | 59937223 | G>C        | P47A     | 0.013    | D        | pathogenic  |

**Table S8b. Somatic mutations in homologous recombination repair genes.**

| PairedNormal             | SampleID  | Chr | Start     | End       | Ref | Alt | GeneID | MutationType        |
|--------------------------|-----------|-----|-----------|-----------|-----|-----|--------|---------------------|
| <b>Primary Tumors</b>    |           |     |           |           |     |     |        |                     |
| kova54CTRneg             | OVAP_54   | 17  | 41247884  | 41247884  | T   | -   | BRCA1  | frameshift deletion |
| kova18CTRneg             | OVAP_18   | 16  | 23634433  | 23634433  | A   | G   | PALB2  | synonymous SNV      |
| kova30CTRneg             | OVAP_30   | 16  | 23619254  | 23619254  | A   | C   | PALB2  | nonsynonymous SNV   |
| kova51CTRneg             | OVAP_51   | 11  | 108139207 | 108139207 | C   | T   | ATM    | synonymous SNV      |
| kova35CTRneg             | OVAP_35   | 13  | 32969071  | 32969071  | G   | A   | BRCA2  | splicing            |
| kova22CTRneg             | OVAP_22   | 13  | 32912843  | 32912843  | G   | -   | BRCA2  | frameshift deletion |
| kova29CTRneg             | OVAP_29   | 13  | 32911403  | 32911403  | T   | G   | BRCA2  | nonsynonymous SNV   |
| kova58CTRneg             | OVAP_58   | 13  | 32910494  | 32910494  | A   | G   | BRCA2  | nonsynonymous SNV   |
| kova6CTRneg              | OVAP_6    | 13  | 32912240  | 32912240  | G   | T   | BRCA2  | stopgain            |
| kova44CTRneg             | OVAP_44_1 | 8   | 90993102  | 90993103  | CC  | -   | NBN    | frameshift deletion |
| kova50CTRneg             | OVAP_50   | 3   | 142231226 | 142231226 | G   | C   | ATR    | synonymous SNV      |
| kova4CTRneg              | OVAP_4    | 3   | 142281468 | 142281468 | C   | A   | ATR    | nonsynonymous SNV   |
| kova21CTRneg             | OVAP_21   | 3   | 142285057 | 142285057 | C   | T   | ATR    | synonymous SNV      |
| <b>Metastatic Tumors</b> |           |     |           |           |     |     |        |                     |
| kova18CTRneg             | OVAM_18   | 16  | 23634433  | 23634433  | A   | G   | PALB2  | synonymous SNV      |
| kova30CTRneg             | OVAM_30   | 16  | 23619254  | 23619254  | A   | C   | PALB2  | nonsynonymous SNV   |
| kova22CTRneg             | OVAM_22   | 13  | 32912843  | 32912843  | G   | -   | BRCA2  | frameshift deletion |
| kova35CTRneg             | OVAM_35   | 13  | 32969071  | 32969071  | G   | A   | BRCA2  | splicing            |
| kova6CTRneg              | OVAM_6    | 13  | 32912240  | 32912240  | G   | T   | BRCA2  | stopgain            |
| kova4CTRneg              | OVAM_4    | 3   | 142281468 | 142281468 | C   | A   | ATR    | nonsynonymous SNV   |
| kova21CTRneg             | OVAM_21   | 3   | 142285057 | 142285057 | C   | T   | ATR    | synonymous SNV      |
| <b>Recurrent Tumors</b>  |           |     |           |           |     |     |        |                     |
| kova54CTRneg             | OVAR_54   | 17  | 41247884  | 41247884  | T   | -   | BRCA1  | frameshift deletion |
| kova58CTRneg             | OVAR_58   | 13  | 32910494  | 32910494  | A   | G   | BRCA2  | nonsynonymous SNV   |

**Table S8c. All rare germline mutations in homologous recombination repair genes.**

| SampleID      | GeneID | Chrom. | Position  | Ref>NonRef | AAChange | SVMScore | SVMPred. |
|---------------|--------|--------|-----------|------------|----------|----------|----------|
| OVAN11        | BRCA1  | 17     | 41245825  | C>A        | E575X    | .        | .        |
| OVAN25        | BRCA1  | 17     | 41244757  | C>A        | V931L    | -0.663   | T        |
| OVAN5         | BRCA1  | 17     | 41243843  | GTTTAC>G   | V1234fs  | .        | .        |
| OVAN6         | BRCA1  | 17     | 41276044  | ACT>A      | E23fs    | .        | .        |
| kova12CTRneg  | BRCA1  | 17     | 41209079  | T>TG       | Q1777fs  | .        | .        |
| kova26CTRneg  | BRCA1  | 17     | 41258504  | A>C        | C61G     | 0.951    | D        |
| kova28CTRneg  | BRCA1  | 17     | 41244964  | T>C        | K862E    | 0.15     | D        |
| kova29CTRneg  | BRCA1  | 17     | 41243800  | C>A        | E1250X   | .        | .        |
| kova34CTRneg  | BRCA1  | 17     | 41258504  | A>C        | C61G     | 0.951    | D        |
| kova3CTRneg   | BRCA1  | 17     | 41245178  | AGT>A      | T790fs   | .        | .        |
| kova41CTRneg  | BRCA1  | 17     | 41244658  | C>T        | G964R    | -0.063   | T        |
| kova44CTRneg  | BRCA1  | 17     | 41258495  | A>G        | C64R     | 0.96     | D        |
| kova51CTRneg  | BRCA1  | 17     | 41243800  | C>A        | E1250X   | .        | .        |
| kova9CTRneg   | BRCA1  | 17     | 41258495  | A>G        | C64R     | 0.96     | D        |
| OVAN10        | BRCA2  | 13     | 32913077  | G>A        | G1529R   | 0.601    | D        |
| OVAN9         | BRCA2  | 13     | 32914758  | AG>A       | E2089fs  | .        | .        |
| OVAN9         | BRCA2  | 13     | 32914760  | CA>C       | H2090fs  | .        | .        |
| kova20CTRneg  | BRCA2  | 13     | 32911538  | G>T        | E1016X   | .        | .        |
| kova20CTRneg  | BRCA2  | 13     | 32911751  | A>T        | T1087S   | -0.927   | T        |
| kova24CTRneg  | BRCA2  | 13     | 32911239  | GT>G       | C916fs   | .        | .        |
| kova30CTRneg  | BRCA2  | 13     | 32929170  | A>T        | R2394X   | .        | .        |
| kova4CTRneg   | BRCA2  | 13     | 32910536  | ATC>A      | I682fs   | .        | .        |
| kova8CTRneg   | BRCA2  | 13     | 32929170  | A>T        | R2394X   | .        | .        |
| kova32CTRneg  | BARD1  | 2      | 215609826 | C>T        | G623E    | -0.392   | T        |
| kova58CTRneg  | BARD1  | 2      | 215645430 | G>C        | L390V    | -0.837   | T        |
| kova595CTRneg | CHEK2  | 22     | 29095917  | C>G        | G85A     | 0.988    | D        |
| OVAN27        | PALB2  | 16     | 23635348  | A>C        | L939W    | -0.715   | T        |
| kova19CTRneg  | PALB2  | 16     | 23634417  | T>G        | K957Q    | -1.001   | T        |
| kova41CTRneg  | PALB2  | 16     | 23646549  | AC>A       | G439fs   | .        | .        |
| OVAN11        | ATM    | 11     | 108224537 | G>A        | V2906I   | 0.141    | D        |
| kova16CTRneg  | ATM    | 11     | 108160454 | A>C        | K1454N   | -0.564   | T        |
| kova39CTRneg  | ATM    | 11     | 108190686 | A>T        | E2118V   | -0.941   | T        |
| kova55CTRneg  | ATM    | 11     | 108121667 | T>C        | F492S    | -0.716   | T        |
| OVAN10        | BRCA2  | 13     | 32913077  | G>A        | G1529R   | 0.601    | D        |
| OVAN9         | BRCA2  | 13     | 32914758  | AG>A       | E2089fs  | .        | .        |
| OVAN9         | BRCA2  | 13     | 32914760  | CA>C       | H2090fs  | .        | .        |
| kova20CTRneg  | BRCA2  | 13     | 32911538  | G>T        | E1016X   | .        | .        |

|              |        |    |           |       |        |        |   |
|--------------|--------|----|-----------|-------|--------|--------|---|
| kova20CTRneg | BRCA2  | 13 | 32911751  | A>T   | T1087S | -0.927 | T |
| kova24CTRneg | BRCA2  | 13 | 32911239  | GT>G  | C916fs | .      | . |
| kova30CTRneg | BRCA2  | 13 | 32929170  | A>T   | R2394X | .      | . |
| kova4CTRneg  | BRCA2  | 13 | 32910536  | ATC>A | I682fs | .      | . |
| kova8CTRneg  | BRCA2  | 13 | 32929170  | A>T   | R2394X | .      | . |
| OVAN2        | BRIP1  | 17 | 59886102  | G>A   | S215F  | -0.388 | T |
| kova57CTRneg | BRIP1  | 17 | 59937223  | G>C   | P47A   | 0.013  | D |
| kova2CTRneg  | RAD51C | 17 | 56809861  | A>G   | K328E  | 0.037  | D |
| kova31CTRneg | RAD51C | 17 | 56770093  | C>T   | A30V   | -0.625 | T |
| kova7CTRneg  | CHEK1  | 11 | 125503091 | C>T   | T153I  | -0.951 | T |

**Table S9. Damaging BROCA mutations. 36% (28/77) of patients contained a known pathogenic variant as found in CLINVAR, a MetaSVM (Noted as “SVM” in table) damaging mutation, or an indel mutation in a BROCA gene.**

| SampleID      | GeneID | Chrom. | Position  | Ref>NonRef | AChange      | SVMscore | SVMpred. | ClinvarAnno |
|---------------|--------|--------|-----------|------------|--------------|----------|----------|-------------|
| OVAN10        | MSH2   | 2      | 47635690  | A>G        | Y55C         | 0.216    | D        | unknown     |
| OVAN10        | RECQL  | 12     | 21639483  | A>G        | M144T        | 0.678    | D        | .           |
| OVAN11        | ATM    | 11     | 108224537 | G>A        | V2906I       | 0.141    | D        | unknown     |
| OVAN11        | TP53   | 17     | 7577548   | C>T        | G206S        | 0.902    | D        | pathogenic  |
| OVAN1         | PTCH1  | 9      | 98215833  | C>T        | V975I        | 0.237    | D        | unknown     |
| OVAN5         | BRCA1  | 17     | 41243843  | GTTTAC>G   | V1234fs      | .        | .        | pathogenic  |
| OVAN6         | NTHL1  | 16     | 2096209   | G>A        | R100C        | 0.727    | D        | .           |
| OVAN6         | BRCA1  | 17     | 41276044  | ACT>A      | E23fs        | .        | .        | pathogenic  |
| OVAN8         | PTCH1  | 9      | 98270592  | TGCC>T     | 17_17del     | .        | .        | .           |
| OVAN9         | BRCA2  | 13     | 32914758  | AG>A       | E2089fs      | .        | .        | .           |
| OVAN9         | BRCA2  | 13     | 32914760  | CA>C       | H2090fs      | .        | .        | .           |
| kova12CTRneg  | BRCA1  | 17     | 41209079  | T>TG       | Q1777fs      | .        | .        | pathogenic  |
| kova22CTRneg  | RET    | 10     | 43604649  | G>A        | V412M        | 0.375    | D        | .           |
| kova24CTRneg  | BRCA2  | 13     | 32911239  | GT>G       | C916fs       | .        | .        | .           |
| kova24CTRneg  | NF1    | 17     | 29654671  | C>T        | T1808M       | 0.146    | D        | .           |
| kova26CTRneg  | BRCA1  | 17     | 41258504  | A>C        | C61G         | 0.951    | D        | .           |
| kova29CTRneg  | BRCA1  | 17     | 41243800  | C>A        | E1250X       | .        | .        | pathogenic  |
| kova2CTRneg   | RAD51C | 17     | 56809861  | A>G        | K328E        | 0.037    | D        | .           |
| kova30CTRneg  | BRCA2  | 13     | 32929170  | A>T        | R2394X       | .        | .        | pathogenic  |
| kova34CTRneg  | BRCA1  | 17     | 41258504  | A>C        | C61G         | 0.951    | D        | .           |
| kova39CTRneg  | CTNNA1 | 5      | 138266269 | C>G        | D706E        | 0.185    | D        | .           |
| kova3CTRneg   | BRCA1  | 17     | 41245178  | AGT>A      | T790fs       | .        | .        | .           |
| kova41CTRneg  | MITF   | 3      | 70014029  | T>C        | L382P        | 0.744    | D        | .           |
| kova41CTRneg  | PALB2  | 16     | 23646549  | AC>A       | G439fs       | .        | .        | .           |
| kova43CTRneg  | APC    | 5      | 112177310 | T>C        | Y2007H       | 0.599    | D        | .           |
| kova44CTRneg  | BRCA1  | 17     | 41258495  | A>G        | C64R         | 0.96     | D        | pathogenic  |
| kova48CTRneg  | MUTYH  | 1      | 45798269  | T>C        | I195V        | 0.46     | D        | unknown     |
| kova4CTRneg   | MSH6   | 2      | 48026006  | A>G        | K295R        | 0.322    | D        | unknown     |
| kova4CTRneg   | BRCA2  | 13     | 32910536  | ATC>A      | I682fs       | .        | .        | unknown     |
| kova51CTRneg  | BRCA1  | 17     | 41243800  | C>A        | E1250X       | .        | .        | pathogenic  |
| kova54CTRneg  | SLX4   | 16     | 3640053   | CAAT>C     | 1195_1195del | .        | .        | .           |
| kova57CTRneg  | BRIP1  | 17     | 59937223  | G>C        | P47A         | 0.013    | D        | pathogenic  |
| kova595CTRneg | CHEK2  | 22     | 29095917  | C>G        | G85A         | 0.988    | D        | .           |
| kova8CTRneg   | BRCA2  | 13     | 32929170  | A>T        | R2394X       | .        | .        | pathogenic  |
| kova9CTRneg   | BRCA1  | 17     | 41258495  | A>G        | C64R         | 0.96     | D        | pathogenic  |



**Table S10. Average quantitative nuclear histological score associated with ex vivo c-MYC expression assessed by IHC in OSC-KRCH31 xenograft tumor samples, excised 1 hour, 6 hours and 12 hours after the last dose of GS-626510 at 10 mg/kg, JQ1 at 50 mg/kg and vehicle for oral gavage studies, following 21 days of treatment.**

| <b>Dosing Group</b> | <b>Time of collection after dosing</b> | <b>Avg QN H-score</b> | <b>SD</b> | <b>P-value vs Vehicle</b> |
|---------------------|----------------------------------------|-----------------------|-----------|---------------------------|
| Vehicle             | 1 hour                                 | 117.33                | 5.86      |                           |
| GS-626510 10mg/kg   | 1 hour                                 | 76.67                 | 2.08      | 0.0003                    |
| JQ1 50mg/kg         | 1 hour                                 | 72.67                 | 15.50     | 0.0095                    |
| Vehicle             | 6 hours                                | 110.33                | 6.81      |                           |
| GS-626510 10mg/kg   | 6 hours                                | 82.67                 | 9.71      | 0.0156                    |
| JQ1 50mg/kg         | 6 hours                                | 79.00                 | 5.00      | 0.0030                    |
| Vehicle             | 12 hours                               | 114.25                | 8.50      |                           |
| GS-626510 10mg/kg   | 12 hours                               | 103.75                | 7.85      | 0.1194                    |
| JQ1 50mg/kg         | 12 hours                               | 105.50                | 14.62     | 0.3406                    |

## References

1. Choi, M. et al. Genetic diagnosis by whole exome capture and massively parallel DNA sequencing. *Proc. Natl. Acad. Sci.* 106, 19096–19101 (2009).
2. Zhao, S. et al. Landscape of somatic single-nucleotide and copy-number mutations in uterine serous carcinoma. *Proc. Natl. Acad. Sci. U. S. A.* 110, 2916–2921 (2013).
3. Beroukhi, R. et al. Assessing the significance of chromosomal aberrations in cancer: Methodology and application to glioma. *Proc Natl Acad Sci USA* 104: 20007–20012 (2007).
4. Favero, F. et al. Sequenza: allele-specific copy number and mutation profiles from tumor sequencing data. *Ann Oncol.* 26: 64-70 (2015).
5. Roth, A. et al. PyClone: statistical inference of clonal population structure in cancer. *Nat Methods.* Apr;11: 396-8 (2014).
6. Dang HX. et al. ClonEvol: clonal ordering and visualization in cancer sequencing. *Ann Oncol.* 28:3076-3082 (2017).
7. Roque, D. et al. Class III  $\beta$ -tubulin overexpression in ovarian clear cell and serous carcinoma as a marker for poor overall survival after platinum/taxane chemotherapy and sensitivity to patupilone. *Am J Obstet Gynecol* 209:62.e1-9 (2013).
8. Bonazzoli, E. et al. Inhibition of BET bromodomain proteins with GS-5829 and GS-626510 in uterine serous carcinoma, a biologically aggressive variant of endometrial cancer. *Clin Cancer Res.* 24(19):4845-4853 (2018).
